# Supplementary material
Source: PubMed Central journal article supplement (PMC8727811)
Supplement: ajcr0011-6173-f3.pdf [file ajcr0011-6173-f3.pdf]

## AFP response predicts treatment outcomes of ICI combination therapies

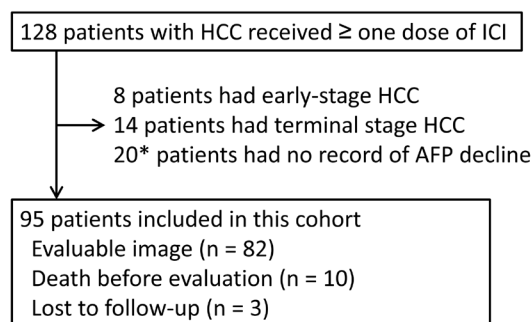

**Supplementary Figure 1.** Flowchart of patient recruitment in this study. \*Nine patients with BCLC stage A or D. AFP,  $\alpha$ -fetoprotein; HCC, hepatocellular carcinoma; ICI, immune checkpoint inhibitor.

**Supplementary Table 1.** TRAEs in 95 patients with hepatocellular carcinoma

| Type of TRAE (n=66) | TRAE, n (%) |                |
|---------------------|-------------|----------------|
|                     | Any grade   | Grade $\geq 3$ |
| Hepatitis*          | 25 (26.3)   | 7 (7.4)        |
| Fatigue             | 17 (17.9)   | 1 (1.1)        |
| Dermatitis          | 14 (14.7)   | 4 (4.2)        |
| Colitis             | 11 (11.6)   | 2 (2.1)        |
| Hand foot syndrome  | 9 (9.5)     | 2 (2.1)        |
| Fever               | 9 (9.5)     | 1 (1.1)        |
| Pneumonitis*        | 4 (4.2)     | 4 (4.2)        |
| Gastric necrosis    | 1 (1.1)     | 1 (1.1)        |
| Proteinuria         | 3 (3.2)     | 0 (0)          |
| Myalgia             | 1 (1.1)     | 0 (0)          |
| Dizziness           | 1 (1.1)     | 0 (0)          |
| Edema               | 1 (1.1)     | 0 (0)          |

\*Among five patients who died from TRAEs, three and two died from severe hepatitis and pneumonitis, respectively. TRAEs, treatment-related adverse events.

**Supplementary Table 2.** Sensitivity, specificity, and Youden's index of different declines in the serum AFP level within the initial 3 months of immune checkpoint inhibitor therapy

| Cut-off for AFP decline | Sensitivity | Specificity | Youden's index |
|-------------------------|-------------|-------------|----------------|
| >10%                    | 0.7255      | 0.7273      | 0.4528         |
| >15%                    | 0.7255      | 0.7955      | 0.5209         |
| >20%                    | 0.6275      | 0.8182      | 0.4456         |

AFP,  $\alpha$ -fetoprotein.

**Supplementary Table 3.** Factors associated with disease control in 82 patients with HCC who underwent radiological imaging (a decline of >10% in the AFP level)

| Character  |                 | Univariate analysis |         | Multivariate analysis |         |
|------------|-----------------|---------------------|---------|-----------------------|---------|
|            |                 | OR (95% CI)         | P value | OR (95% CI)           | P value |
| Age (year) |                 | 1.064 (1.016-1.113) | 0.008   |                       |         |
| Sex        | Male vs. female | 0.371 (0.073-1.872) | 0.230   |                       |         |
| Alcohol    | Yes vs. no      | 0.752 (0.274-2.065) | 0.580   |                       |         |
| HBV        | Yes vs. no      | 0.452 (0.180-1.133) | 0.090   |                       |         |
| HCV        | Yes vs. no      | 2.600 (0.848-7.971) | 0.095   |                       |         |

## AFP response predicts treatment outcomes of ICI combination therapies

|                        |                       |                      |       |                      |       |
|------------------------|-----------------------|----------------------|-------|----------------------|-------|
| DM                     | Yes vs. no            | 1.247 (0.486-3.202)  | 0.647 |                      |       |
| Grade 1-2 TRAEs        | Yes vs. no            | 2.769 (1.103-6.954)  | 0.030 |                      |       |
| Grade $\geq$ 3 TRAEs   | Yes vs. no            | 1.256 (0.345-4.576)  | 0.730 |                      |       |
| TTV (cm <sup>3</sup> ) | >1000 vs. $\leq$ 1000 | 0.633 (0.256-1.565)  | 0.322 |                      |       |
| MVI                    | Yes vs. no            | 0.336 (0.130-0.870)  | 0.025 |                      |       |
| EHM                    | Yes vs. no            | 0.498 (0.192-1.290)  | 0.151 |                      |       |
| AFP (ng/mL)            | $\geq$ 400 vs. <400   | 0.273 (0.107-0.701)  | 0.007 |                      |       |
| AST (U/L)              | >40 vs. $\leq$ 40     | 0.412 (0.142-1.197)  | 0.103 |                      |       |
| ALT (U/L)              | >40 vs. $\leq$ 40     | 0.452 (0.180-1.133)  | 0.090 |                      |       |
| NLR                    | >3.0 vs. $\leq$ 3.0   | 0.205 (0.062-0.673)  | 0.009 |                      |       |
| Child-Pugh class       | B vs. A               | 0.757 (0.285-2.010)  | 0.576 |                      |       |
| ALBI grade             | 2/3 vs. 1             | 0.571 (0.195-1.673)  | 0.307 |                      |       |
| AFP decline >10%       | Yes vs. no            | 7.145 (2.631-19.404) | 0.001 | 6.163 (1.755-21.640) | 0.005 |
| Combination therapy*   | Yes vs. no            | 2.683 (0.769-9.359)  | 0.121 |                      |       |

\*Combination therapy includes tyrosine kinase inhibitors, radiofrequency ablation, transarterial chemoembolization, and stereotactic body radiotherapy for hepatocellular carcinoma. AFP,  $\alpha$ -fetoprotein; ALBI, albumin-bilirubin; ALT, alanine aminotransferase; AST, aspartate aminotransferase; DM, diabetes mellitus; EHM, extrahepatic metastasis; HBV, hepatitis B virus; HCV, hepatitis C virus; TRAEs, treatment-related adverse events; MVI, macroscopic vascular invasion; NLR, neutrophil-to-lymphocyte ratio; TTV, total tumor volume.

**Supplementary Table 4.** Factors associated with disease control in 82 patients with HCC who underwent radiological imaging (a decline of >20% in the AFP level)

| Character              |                       | Univariate analysis  |         | Multivariate analysis |         |
|------------------------|-----------------------|----------------------|---------|-----------------------|---------|
|                        |                       | OR (95% CI)          | P value | OR (95% CI)           | P value |
| Age (year)             |                       | 1.064 (1.016-1.113)  | 0.008   |                       |         |
| Sex                    | Male vs. female       | 0.371 (0.073-1.872)  | 0.230   |                       |         |
| Alcohol                | Yes vs. no            | 0.752 (0.274-2.065)  | 0.580   |                       |         |
| HBV                    | Yes vs. no            | 0.452 (0.180-1.133)  | 0.090   |                       |         |
| HCV                    | Yes vs. no            | 2.600 (0.848-7.971)  | 0.095   |                       |         |
| DM                     | Yes vs. no            | 1.247 (0.486-3.202)  | 0.647   |                       |         |
| Grade 1-2 irAEs        | Yes vs. no            | 2.769 (1.103-6.954)  | 0.030   |                       |         |
| Grade $\geq$ 3 irAEs   | Yes vs. no            | 1.256 (0.345-4.576)  | 0.730   |                       |         |
| TTV (cm <sup>3</sup> ) | >1000 vs. $\leq$ 1000 | 0.633 (0.256-1.565)  | 0.322   |                       |         |
| MVI                    | Yes vs. no            | 0.336 (0.130-0.870)  | 0.025   |                       |         |
| EHM                    | Yes vs. no            | 0.498 (0.192-1.290)  | 0.151   |                       |         |
| AFP (ng/mL)            | $\geq$ 400 vs. <400   | 0.273 (0.107-0.701)  | 0.007   |                       |         |
| AST (U/L)              | >40 vs. $\leq$ 40     | 0.412 (0.142-1.197)  | 0.103   |                       |         |
| ALT (U/L)              | >40 vs. $\leq$ 40     | 0.452 (0.180-1.133)  | 0.090   |                       |         |
| NLR                    | >3.0 vs. $\leq$ 3.0   | 0.205 (0.062-0.673)  | 0.009   |                       |         |
| Child-Pugh class       | B vs. A               | 0.757 (0.285-2.010)  | 0.576   |                       |         |
| ALBI grade             | 2/3 vs. 1             | 0.571 (0.195-1.673)  | 0.307   |                       |         |
| AFP decline >20%       | Yes vs. no            | 7.639 (2.646-22.050) | <0.001  | 7.802 (2.015-30.207)  | 0.003   |
| Combination therapy*   | Yes vs. no            | 2.683 (0.769-9.359)  | 0.121   |                       |         |

\*Combination therapy includes tyrosine kinase inhibitors, radiofrequency ablation, transarterial chemoembolization, and stereotactic body radiotherapy for hepatocellular carcinoma. AFP,  $\alpha$ -fetoprotein; ALBI, albumin-bilirubin; ALT, alanine aminotransferase; AST, aspartate aminotransferase; DM, diabetes mellitus; EHM, extrahepatic metastasis; HBV, hepatitis B virus; HCV, hepatitis C virus; TRAEs, treatment-related adverse events; MVI, macroscopic vascular invasion; NLR, neutrophil-to-lymphocyte ratio; TTV, total tumor volume.

## AFP response predicts treatment outcomes of ICI combination therapies

**Supplementary Table 5.** Factors associated with progression-free survival in 95 patients with unresectable hepatocellular carcinoma (a decline of >10% in the AFP level)

| Character              | Univariate analysis |                     | Multivariate analysis |                     |         |
|------------------------|---------------------|---------------------|-----------------------|---------------------|---------|
|                        |                     | HR (95% CI)         | P value               | HR (95% CI)         | P value |
| Age (year)             |                     | 0.976 (0.955-0.998) | 0.034                 |                     |         |
| Sex                    | Male vs. female     | 1.270 (0.607-2.659) | 0.526                 |                     |         |
| Alcohol                | Yes vs. no          | 2.004 (1.211-3.316) | 0.007                 |                     |         |
| HBV                    | Yes vs. no          | 1.107 (0.690-1.777) | 0.673                 |                     |         |
| HCV                    | Yes vs. no          | 0.641 (0.365-1.124) | 0.120                 |                     |         |
| DM                     | Yes vs. no          | 0.814 (0.495-1.340) | 0.419                 |                     |         |
| Grade 1-2 TRAEs        | Yes vs. no          | 0.572 (0.356-0.919) | 0.021                 |                     |         |
| Grade ≥3 TRAEs         | Yes vs. no          | 1.455 (0.799-2.647) | 0.220                 |                     |         |
| TTV (cm <sup>3</sup> ) | >1000 vs. ≤1000     | 1.641 (1.021-2.635) | 0.041                 |                     |         |
| MVI                    | Yes vs. no          | 2.193 (1.323-3.635) | 0.002                 | 3.355 (1.659-6.788) | 0.001   |
| EHM                    | Yes vs. no          | 1.375 (0.837-2.260) | 0.209                 |                     |         |
| AFP (ng/mL)            | <400 vs. ≥400       | 2.021 (1.246-3.278) | 0.004                 |                     |         |
| AST (U/L)              | >40 vs. ≤40         | 1.939 (1.094-3.436) | 0.023                 |                     |         |
| ALT (U/L)              | >40 vs. ≤40         | 1.644 (1.011-2.672) | 0.045                 | 2.576 (1.148-5.780) | 0.022   |
| NLR                    | >3.0 vs. ≤3.0       | 2.181 (1.221-3.895) | 0.008                 |                     |         |
| Child-Pugh class       | B vs. A             | 1.659 (1.018-2.704) | 0.042                 |                     |         |
| ALBI grade             | 2/3 vs. 1           | 1.649 (0.936-2.905) | 0.084                 |                     |         |
| AFP decline >10%       | Yes vs. no          | 0.314 (0.192-0.514) | <0.001                | 0.378 (0.200-0.716) | 0.003   |
| Combination therapy*   | Yes vs. no          | 0.363 (0.206-0.641) | <0.001                | 0.249 (0.114-0.543) | <0.001  |
| Best response          | CR+PR+SD vs. none   | 0.112 (0.064-0.198) | <0.001                | 0.119 (0.052-0.272) | <0.001  |

\*Combination therapy includes tyrosine kinase inhibitors, radiofrequency ablation, transarterial chemoembolization, and stereotactic body radiotherapy for hepatocellular carcinoma. AFP, α-fetoprotein; ALBI, albumin-bilirubin; ALT, alanine aminotransferase; AST, aspartate aminotransferase; CR+PR+SD, complete response plus partial response plus stable disease; DM, diabetes mellitus; EHM, extrahepatic metastasis; HBV, hepatitis B virus; HCV, hepatitis C virus; TRAEs, treatment-related adverse events; MVI, macroscopic vascular invasion; NLR, neutrophil-to-lymphocyte ratio; TTV, total tumor volume.

**Supplementary Table 6.** Factors associated with progression-free survival in 95 patients with unresectable hepatocellular carcinoma (a decline of >20% in the AFP level)

| Character              | Univariate analysis |                     | Multivariate analysis |                     |         |
|------------------------|---------------------|---------------------|-----------------------|---------------------|---------|
|                        |                     | HR (95% CI)         | P value               | HR (95% CI)         | P value |
| Age (year)             |                     | 0.976 (0.955-0.998) | 0.034                 |                     |         |
| Sex                    | Male vs. female     | 1.270 (0.607-2.659) | 0.526                 |                     |         |
| Alcohol                | Yes vs. no          | 2.004 (1.211-3.316) | 0.007                 |                     |         |
| HBV                    | Yes vs. no          | 1.107 (0.690-1.777) | 0.673                 |                     |         |
| HCV                    | Yes vs. no          | 0.641 (0.365-1.124) | 0.120                 |                     |         |
| DM                     | Yes vs. no          | 0.814 (0.495-1.340) | 0.419                 |                     |         |
| Grade 1-2 TRAEs        | Yes vs. no          | 0.572 (0.356-0.919) | 0.021                 |                     |         |
| Grade ≥3 TRAEs         | Yes vs. no          | 1.455 (0.799-2.647) | 0.220                 |                     |         |
| TTV (cm <sup>3</sup> ) | >1000 vs. ≤1000     | 1.641 (1.021-2.635) | 0.041                 |                     |         |
| MVI                    | Yes vs. no          | 2.193 (1.323-3.635) | 0.002                 | 3.360 (1.659-6.805) | 0.001   |
| EHM                    | Yes vs. no          | 1.375 (0.837-2.260) | 0.209                 |                     |         |
| AFP (ng/mL)            | <400 vs. ≥400       | 2.021 (1.246-3.278) | 0.004                 |                     |         |
| AST (U/L)              | >40 vs. ≤40         | 1.939 (1.094-3.436) | 0.023                 |                     |         |
| ALT (U/L)              | >40 vs. ≤40         | 1.644 (1.011-2.672) | 0.045                 | 2.576 (1.148-5.780) | 0.022   |
| NLR                    | >3.0 vs. ≤3.0       | 2.181 (1.221-3.895) | 0.008                 |                     |         |
| Child-Pugh class       | B vs. A             | 1.659 (1.018-2.704) | 0.042                 |                     |         |

## AFP response predicts treatment outcomes of ICI combination therapies

|                      |                   |                     |        |                     |        |
|----------------------|-------------------|---------------------|--------|---------------------|--------|
| ALBI grade           | 2/3 vs. 1         | 1.649 (0.936-2.905) | 0.084  |                     |        |
| AFP decline >20%     | Yes vs. no        | 0.417 (0.254-0.682) | 0.001  | 0.430 (0.223-0.829) | 0.012  |
| Combination therapy* | Yes vs. no        | 0.363 (0.206-0.641) | <0.001 | 0.230 (0.103-0.511) | <0.001 |
| Best response        | CR+PR+SD vs. none | 0.112 (0.064-0.198) | <0.001 | 0.126 (0.056-0.283) | <0.001 |

\*Combination therapy includes tyrosine kinase inhibitors, radiofrequency ablation, transarterial chemoembolization, and stereotactic body radiotherapy for hepatocellular carcinoma. AFP,  $\alpha$ -fetoprotein; ALBI, albumin-bilirubin; ALT, alanine aminotransferase; AST, aspartate aminotransferase; CR+PR+SD, complete response plus partial response plus stable disease; DM, diabetes mellitus; EHM, extrahepatic metastasis; HBV, hepatitis B virus; HCV, hepatitis C virus; TRAEs, treatment-related adverse events; MVI, macroscopic vascular invasion; NLR, neutrophil-to-lymphocyte ratio; TTV, total tumor volume.

**Supplementary Table 7.** Factors associated with overall survival in 95 patients with unresectable hepatocellular carcinoma (a decline of >10% in the AFP level)

| Character              |                       | Univariate analysis |         | Multivariate analysis |         |
|------------------------|-----------------------|---------------------|---------|-----------------------|---------|
|                        |                       | HR (95% CI)         | P value | HR (95% CI)           | P value |
| Age (year)             |                       | 0.985 (0.959-1.012) | 0.266   |                       |         |
| Sex                    | Male vs. female       | 2.416 (0.751-7.771) | 0.139   |                       |         |
| Alcohol                | Yes vs. no            | 1.447 (0.777-2.695) | 0.244   |                       |         |
| HBV                    | Yes vs. no            | 1.134 (0.645-1.994) | 0.663   |                       |         |
| HCV                    | Yes vs. no            | 0.727 (0.363-1.455) | 0.368   |                       |         |
| DM                     | Yes vs. no            | 0.646 (0.348-1.199) | 0.166   |                       |         |
| Grade 1-2 TRAEs        | Yes vs. no            | 0.431 (0.243-0.763) | 0.004   |                       |         |
| Grade $\geq$ 3 TRAEs   | Yes vs. no            | 1.755 (0.894-3.446) | 0.102   |                       |         |
| TTV (cm <sup>3</sup> ) | >1000 vs. $\leq$ 1000 | 2.247 (1.278-3.950) | 0.005   |                       |         |
| MVI                    | Yes vs. no            | 3.803 (1.961-7.375) | <0.001  | 4.008 (1.637-9.810)   | 0.002   |
| EHM                    | Yes vs. no            | 1.310 (0.733-2.339) | 0.362   |                       |         |
| AFP (ng/mL)            | <400 vs. $\geq$ 400   | 3.113 (1.744-5.557) | <0.001  |                       |         |
| AST (U/L)              | >40 vs. $\leq$ 40     | 3.510 (1.564-7.876) | 0.002   |                       |         |
| ALT (U/L)              | >40 vs. $\leq$ 40     | 2.163 (1.208-3.872) | 0.009   |                       |         |
| NLR                    | >3.0 vs. $\leq$ 3.0   | 3.704 (1.657-8.280) | 0.001   |                       |         |
| Child-Pugh class       | B vs. A               | 2.492 (1.417-4.381) | 0.002   |                       |         |
| ALBI grade             | 2/3 vs. 1             | 3.499 (1.553-7.883) | 0.003   |                       |         |
| AFP decline >10%       | Yes vs. no            | 0.383 (0.217-0.676) | 0.001   | 0.395 (0.190-0.821)   | 0.013   |
| Combination therapy*   | Yes vs. no            | 0.441 (0.218-0.892) | 0.023   |                       |         |
| Best response          | CR+PR+SD vs. none     | 0.165 (0.088-0.308) | <0.001  | 0.429 (0.203-0.908)   | 0.027   |

\*Combination therapy includes tyrosine kinase inhibitors, radiofrequency ablation, transarterial chemoembolization, and stereotactic body radiotherapy for hepatocellular carcinoma. AFP,  $\alpha$ -fetoprotein; ALBI, albumin-bilirubin; ALT, alanine aminotransferase; AST, aspartate aminotransferase; CR+PR+SD, complete response plus partial response plus stable disease; DM, diabetes mellitus; EHM, extrahepatic metastasis; HBV, hepatitis B virus; HCV, hepatitis C virus; TRAEs, treatment-related adverse events; MVI, macroscopic vascular invasion; NLR, neutrophil-to-lymphocyte ratio; TTV, total tumor volume.

## AFP response predicts treatment outcomes of ICI combination therapies

**Supplementary Table 8.** Factors associated with overall survival in 95 patients with unresectable hepatocellular carcinoma (a decline of >20% in the AFP level)

| Character              | Univariate analysis |                     | Multivariate analysis |                           |
|------------------------|---------------------|---------------------|-----------------------|---------------------------|
|                        | HR (95% CI)         | P value             | HR (95% CI)           | P value                   |
| Age (year)             | 0.985 (0.959-1.012) | 0.266               |                       |                           |
| Sex                    | Male vs. female     | 2.416 (0.751-7.771) | 0.139                 |                           |
| Alcohol                | Yes vs. no          | 1.447 (0.777-2.695) | 0.244                 |                           |
| HBV                    | Yes vs. no          | 1.134 (0.645-1.994) | 0.663                 |                           |
| HCV                    | Yes vs. no          | 0.727 (0.363-1.455) | 0.368                 |                           |
| DM                     | Yes vs. no          | 0.646 (0.348-1.199) | 0.166                 |                           |
| Grade 1-2 TRAEs        | Yes vs. no          | 0.431 (0.243-0.763) | 0.004                 |                           |
| Grade ≥3 TRAEs         | Yes vs. no          | 1.755 (0.894-3.446) | 0.102                 |                           |
| TTV (cm <sup>3</sup> ) | >1000 vs. ≤1000     | 2.247 (1.278-3.950) | 0.005                 |                           |
| MVI                    | Yes vs. no          | 3.803 (1.961-7.375) | <0.001                | 4.039 (1.647-9.904) 0.002 |
| EHM                    | Yes vs. no          | 1.310 (0.733-2.339) | 0.362                 |                           |
| AFP (ng/mL)            | <400 vs. ≥400       | 3.113 (1.744-5.557) | <0.001                |                           |
| AST (U/L)              | >40 vs. ≤40         | 3.510 (1.564-7.876) | 0.002                 |                           |
| ALT (U/L)              | >40 vs. ≤40         | 2.163 (1.208-3.872) | 0.009                 |                           |
| NLR                    | >3.0 vs. ≤3.0       | 3.704 (1.657-8.280) | 0.001                 |                           |
| Child-Pugh class       | B vs. A             | 2.492 (1.417-4.381) | 0.002                 |                           |
| ALBI grade             | 2/3 vs. 1           | 3.499 (1.553-7.883) | 0.003                 |                           |
| AFP decline >20%       | Yes vs. no          | 0.377 (0.207-0.685) | 0.001                 | 0.320 (0.150-0.683) 0.003 |
| Combination therapy*   | Yes vs. no          | 0.441 (0.218-0.892) | 0.023                 | 0.338 (0.122-0.938) 0.037 |
| Best response          | CR+PR+SD vs. none   | 0.165 (0.088-0.308) | <0.001                | 0.432 (0.208-0.896) 0.024 |

\*Combination therapy includes tyrosine kinase inhibitors, radiofrequency ablation, transarterial chemoembolization, and stereotactic body radiotherapy for hepatocellular carcinoma. AFP, α-fetoprotein; ALBI, albumin-bilirubin; ALT, alanine aminotransferase; AST, aspartate aminotransferase; CR+PR+SD, complete response plus partial response plus stable disease; DM, diabetes mellitus; EHM, extrahepatic metastasis; HBV, hepatitis B virus; HCV, hepatitis C virus; TRAEs, treatment-related adverse events; MVI, macroscopic vascular invasion; NLR, neutrophil-to-lymphocyte ratio; TTV, total tumor volume.

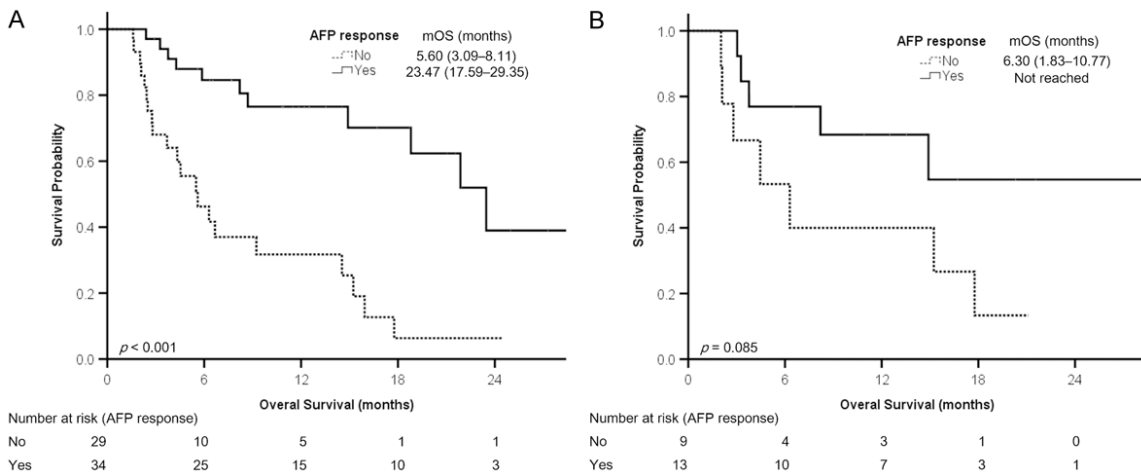

**Supplementary Figure 2.** Kaplan-Meier analysis of overall survival in the subgroups of patients with or without AFP response. A. A subgroup of patients receiving combined immune checkpoint inhibitor (ICI) and tyrosine kinase inhibitor therapy. B. A subgroup of patients receiving combined ICI and stereotactic body radiotherapy for hepatocellular carcinoma. Survival is presented as the median (95% confidence interval). AFP, α-fetoprotein; mOS, median overall survival.
